# Supplementary material
Source: HighWire-hosted journal article supplement (https://jnm.snmjournals.org/highwire/filestream/94582/field_highwire_adjunct_files/0/140228_Supplemental_Data.pdf)
Supplement: 140228_Supplemental_Data.pdf [file 140228_Supplemental_Data.pdf]

**Supplemental Table 1.** Summary of Ioflupane I123 Injection Exposure by Study – ITD Population

|                                                                            |           | <b>Study A (4)</b> | <b>Study B (5,6)</b> | <b>Study C (1)*</b> | <b>Study D (3,8)</b> | <b>Study E (2,7)</b> |
|----------------------------------------------------------------------------|-----------|--------------------|----------------------|---------------------|----------------------|----------------------|
| Number of subjects dosed                                                   | n         | 220                | 326                  | 102                 | 78                   | 122 <sup>†</sup>     |
| Number of Doses                                                            |           |                    |                      |                     |                      |                      |
| 1                                                                          | n (%)     | 220 (100%)         | 326 (100%)           | 3 (3%)              | 72 (92%)             | 122 (100%)           |
| 2                                                                          | n (%)     | 0 (0%)             | 0 (0%)               | 2 (2%)              | 6 (8%)               | 0 (0%)               |
| 3                                                                          | n (%)     | 0 (0%)             | 0 (0%)               | 97 (95%)            | 0 (0%)               | 0 (0%)               |
| Net activity administered (MBq)                                            | n         | 220                | 325                  | 102                 | 78                   | 120                  |
|                                                                            | Mean (SD) | 161.9 (26.20)      | 184.2 (22.30)        | 471.2 (80.03)       | 178.1 (44.65)        | 171.10 (12.46)       |
|                                                                            | Min, Max  | 111, 204           | 121, 287             | 153, 551            | 114, 356             | 121, 203             |
|                                                                            | Median    | 164.8              | 178.5                | 509.2               | 173.5                | 172.8                |
| Time of SPECT imaging initiation after ioflupane ( <sup>123</sup> I) (hrs) | n         | 220                | 326                  | 102                 | 78                   | 120                  |
|                                                                            | Mean (SD) | 3.7 (0.68)         | 3.6 (0.53)           | 3.5 (0.34)          | 3.9 (0.48)           | N/A <sup>‡</sup>     |
|                                                                            | Min, Max  | 2, 6               | 3, 6                 | 3, 5                | 3, 5                 | 3, 6                 |
|                                                                            | Median    | 3.5                | 3.5                  | 3.5                 | 3.9                  | N/A                  |

ITD = Intent to diagnosis; n = Number; SD = Standard deviation; Min = Minimum; Max = Maximum; SPECT = single-photon emission computed tomography; hrs = hours.

\*Study C had multiple doses. The subjects were only counted once. The multiple doses were summed for each subject. The multiple time to SPECT imaging was averaged for each subject.

<sup>†</sup>Reported for n=122 safety population, not n=92 efficacy population. In spite of small differences in the sample size, the mean values for reported parameters are the same.

<sup>‡</sup>Different data points were collected for Study E – see Supplemental Table 3.

**Supplemental Table 2.** Summary of Ioflupane I123 Injection Exposure by Study – PP Population

|                                                                            |           | Study         |               |               |               |
|----------------------------------------------------------------------------|-----------|---------------|---------------|---------------|---------------|
|                                                                            |           | Study A (4)   | Study B (5,6) | Study C (1)*  | Study D (3,8) |
| Number of subjects dosed                                                   | n         | 157           | 288           | 100           | 77            |
| Number of Doses                                                            |           |               |               |               |               |
| 1                                                                          | n (%)     | 157 (100%)    | 288 (100%)    | 3 (3%)        | 71 (92%)      |
| 2                                                                          | n (%)     | 0 (0%)        | 0 (0%)        | 2 (2%)        | 6 (8%)        |
| 3                                                                          | n (%)     | 0 (0%)        | 0 (0%)        | 95 (95%)      | 0 (0%)        |
| Net activity administered (MBq)                                            | n         | 157           | 287           | 100           | 77            |
|                                                                            | Mean (SD) | 152.4 (23.33) | 184.5 (22.47) | 470.9 (80.35) | 178.3 (44.91) |
|                                                                            | Min, Max  | 111, 185      | 121, 287      | 153, 551      | 114, 356      |
|                                                                            | Median    | 151.0         | 178.4         | 509.2         | 173.7         |
| Time of SPECT imaging initiation after ioflupane ( <sup>123</sup> I) (hrs) | n         | 157           | 288           | 100           | 77            |
|                                                                            | Mean (SD) | 3.7 (0.64)    | 3.6 (0.54)    | 3.5 (0.34)    | 3.9 (0.48)    |
|                                                                            | Min, Max  | 3, 6          | 3, 6          | 3, 5          | 3, 5          |
|                                                                            | Median    | 3.5           | 3.5           | 3.5           | 3.9           |

PP = Per protocol; n = Number; SD = Standard deviation; Min = Minimum; Max = Maximum; SPECT = single-photon emission computed tomography; hrs = hours.

\*Study C had multiple doses. The subjects were only counted once. The multiple doses were summed for each subject. The multiple time to SPECT imaging was averaged for each subject.

Study E exposure data for PP were similar to ITD population (not shown).

**Supplemental Table 3.** Summary of Ioflupane I123 Injection Exposure for Study E (2,7) – Safety Population

|                                |           | <b>Study E</b> |
|--------------------------------|-----------|----------------|
| Number of subjects dosed       | n         | 122*           |
| Total Volume Administered (mL) | n         | 117            |
|                                | Mean (SD) | 2.304 (0.6587) |
|                                | Min, Max  | 1.48, 4.99     |
|                                | Median    | 2.360          |
| Infusion duration (min) †      | n         | 122            |
|                                | Mean (SD) | 2.0 (0.88)     |
|                                | Min, Max  | 1, 5           |
|                                | Median    | 2.0            |

n = Number; mL = milliliter; SD = Standard deviation; Min = Minimum; Max = Maximum; min = Minutes.

\*Reported for n=122 safety population, not n=92 efficacy population. In spite of small differences in the sample size, the mean values for reported parameters are the same. Data shown are not included in the drug exposure Supplemental Table 1.

†Duration was calculated as administration stop time – administration start time + 1.

**Supplemental Table 4.** Sensitivity (PPA) and specificity (NPA) for individual blinded readers and on-site readers for subjects with expert clinical diagnosis of dementia with Lewy Bodies – ITD and PP populations

| Study and Reader Design                            | ITD population             |                            | PP population              |                            |
|----------------------------------------------------|----------------------------|----------------------------|----------------------------|----------------------------|
|                                                    | Sensitivity<br>(%, 95% CI) | Specificity<br>(%, 95% CI) | Sensitivity<br>(%, 95% CI) | Specificity<br>(%, 95% CI) |
| Study B (5,6)                                      | N = 326                    |                            | N = 288                    |                            |
| Study B – Baseline SPECT<br>vs. Baseline Diagnosis |                            |                            |                            |                            |
| Reader A                                           | 79.7% (69.2, 88.0)         | 91.2% (85.2, 95.4)         | 79.7% (69.2, 88.0)         | 91.2% (85.2, 95.4)         |
| Reader B                                           | 75.3% (64.2, 84.4)         | 88.5% (82.0, 93.3)         | 75.3% (64.2, 84.4)         | 88.5% (82.0, 93.3)         |
| Reader C                                           | 80.2% (69.9, 88.3)         | 90.5% (84.3, 94.9)         | 80.2% (69.9, 88.3)         | 91.2% (85.1, 95.4)         |
| On-site                                            | 88.3% (80.0, 94.0)         | 77.4% (69.7, 83.9)         | 87.5% (78.7, 93.6)         | 77.1% (69.3, 83.7)         |
| Study B – Baseline SPECT<br>vs. M12 Diagnosis      |                            |                            |                            |                            |
| Reader A                                           | 82.3% (72.1, 90.0)         | 95.0% (89.3, 98.1)         | 82.3% (72.1, 90.0)         | 95.0% (89.3, 98.1)         |
| Reader B                                           | 74.4% (63.2, 83.6)         | 91.7% (85.3, 96.0)         | 74.4% (63.2, 83.6)         | 91.7% (85.3, 96.0)         |
| Reader C                                           | 78.8% (68.2, 87.1)         | 91.6% (85.1, 95.9)         | 78.8% (68.2, 87.1)         | 92.4% (86.0, 96.5)         |
| On-site                                            | 89.9% (81.7, 95.3)         | 81.6% (73.7, 88.0)         | 89.5% (81.1, 95.1)         | 81.5% (73.5, 87.9)         |

PPA = Positive percent agreement; NPA = Negative percent agreement; ITD = Intent to diagnose; PP = Per Protocol; CI = Confidence interval; N = Number; SPECT = single-photon emission computed tomography; vs. = Versus; M = Month.

Sensitivity/specificity for dementia with Lewy Bodies (DLB) is calculated based on Probable DLB vs. Non-DLB.

**Supplemental Table 5.** Sensitivity (PPA) and specificity (NPA) for individual blinded readers and on-site readers for subjects with expert clinical diagnosis of Parkinsonian Syndrome – ITD and PP populations

| Study and Reader Design                                                   | ITD population             |                            | PP population              |                            |
|---------------------------------------------------------------------------|----------------------------|----------------------------|----------------------------|----------------------------|
|                                                                           | Sensitivity<br>(%, 95% CI) | Specificity<br>(%, 95% CI) | Sensitivity<br>(%, 95% CI) | Specificity<br>(%, 95% CI) |
| Study A (4)                                                               | N = 220                    |                            | N = 157                    |                            |
| Study A – Baseline SPECT<br>vs. Baseline Clinical<br>Diagnosis            |                            |                            |                            |                            |
| Reader A                                                                  | 93.0% (87.9, 96.5)         | 93.5% (84.3, 98.2)         | 92.2% (85.7, 96.4)         | 92.9% (80.5, 98.5)         |
| Reader B                                                                  | 96.8% (92.8, 99.0)         | 80.6% (68.6, 89.6)         | 97.4% (92.6, 99.5)         | 85.7% (71.5, 94.6)         |
| Reader C                                                                  | 96.2% (91.9, 98.6)         | 91.9% (82.2, 97.3)         | 96.5% (91.3, 99.0)         | 95.2% (83.8, 99.4)         |
| Reader D                                                                  | 92.4% (87.1, 96.0)         | 96.8% (88.8, 99.6)         | 92.2% (85.7, 96.4)         | 97.6% (87.4, 99.9)         |
| Reader E                                                                  | 94.3% (89.5, 97.4)         | 91.9% (82.2, 97.3)         | 93.9% (87.9, 97.5)         | 90.5% (77.4, 97.3)         |
| On-site                                                                   | 97.5% (93.6, 99.3)         | 98.4% (91.3, 100.0)        | 96.5% (91.3, 99.0)         | 100.0% (91.6, 100.0)       |
| Study C (1)                                                               | N = 102                    |                            | N = 100                    |                            |
| Study C – Baseline SPECT<br>vs. M18 Diagnosis Clinical<br>Expert Reader 1 |                            |                            |                            |                            |
| Reader A                                                                  | 67.0% (56.9, 76.1)         | 75.0% (55.1, 89.3)         | 65.6% (55.2, 75.0)         | 75.0% (55.1, 89.3)         |
| Reader B                                                                  | 67.0% (56.7, 76.2)         | 75.0% (55.1, 89.3)         | 65.6% (55.0, 75.1)         | 75.0% (55.1, 89.3)         |
| Reader C                                                                  | 67.7% (57.5, 76.7)         | 75.0% (55.1, 89.3)         | 66.3% (55.9, 75.7)         | 75.0% (55.1, 89.3)         |
| On-site                                                                   | 71.0% (61.1, 79.6)         | 75.0% (55.1, 89.3)         | 69.8% (59.6, 78.7)         | 75.0% (55.1, 89.3)         |
| Study C – Baseline SPECT<br>vs. M18 Diagnosis Clinical<br>Expert Reader 2 |                            |                            |                            |                            |
| Reader A                                                                  | 70.5% (60.3, 79.4)         | 83.3% (65.3, 94.4)         | 69.2% (58.7, 78.5)         | 83.3% (65.3, 94.4)         |
| Reader B                                                                  | 69.6% (59.1, 78.7)         | 80.0% (61.4, 92.3)         | 68.2% (57.4, 77.7)         | 80.0% (61.4, 92.3)         |
| Reader C                                                                  | 71.3% (61.0, 80.1)         | 83.3% (65.3, 94.4)         | 70.0% (59.4, 79.2)         | 83.3% (65.3, 94.4)         |
| On-site                                                                   | 73.7% (63.6, 82.2)         | 80.0% (61.4, 92.3)         | 72.5% (62.2, 81.4)         | 80.0% (61.4, 92.3)         |
| Study C – Baseline SPECT<br>vs. M36 Diagnosis                             |                            |                            |                            |                            |
| Reader A                                                                  | 77.5% (66.0, 86.5)         | 96.8% (83.3, 99.9)         | 76.8% (65.1, 86.1)         | 96.8% (83.3, 99.9)         |
| Reader B                                                                  | 77.9% (66.2, 87.1)         | 96.8% (83.3, 99.9)         | 77.3% (65.3, 86.7)         | 96.8% (83.3, 99.9)         |
| Reader C                                                                  | 78.6% (67.1, 87.5)         | 96.8% (83.3, 99.9)         | 77.9% (66.2, 87.1)         | 96.8% (83.3, 99.9)         |
| On-site                                                                   | 80.3% (69.1, 88.8)         | 90.3% (74.2, 98.0)         | 79.7% (68.3, 88.4)         | 90.3% (74.2, 98.0)         |

| Study and Reader Design                                              | ITD population             |                            | PP population              |                            |
|----------------------------------------------------------------------|----------------------------|----------------------------|----------------------------|----------------------------|
|                                                                      | Sensitivity<br>(%, 95% CI) | Specificity<br>(%, 95% CI) | Sensitivity<br>(%, 95% CI) | Specificity<br>(%, 95% CI) |
| Study C – M18 SPECT vs.<br>M18 Diagnosis Clinical<br>Expert Reader 1 |                            |                            |                            |                            |
| Reader A                                                             | 68.4% (58.2, 77.4)         | 75.0% (55.1, 89.3)         | 67.0% (56.6, 76.4)         | 75.0% (55.1, 89.3)         |
| Reader B                                                             | 68.7% (58.6, 77.6)         | 75.0% (55.1, 89.3)         | 67.4% (57.0, 76.6)         | 75.0% (55.1, 89.3)         |
| Reader C                                                             | 69.7% (59.6, 78.5)         | 71.4% (51.3, 86.8)         | 68.4% (58.1, 77.6)         | 71.4% (51.3, 86.8)         |
| On-site                                                              | 72.4% (62.5, 81.0)         | 75.0% (55.1, 89.3)         | 71.3% (61.0, 80.1)         | 75.0% (55.1, 89.3)         |
| Study C – M18 SPECT vs.<br>M18 Diagnosis Clinical<br>Expert Reader 2 |                            |                            |                            |                            |
| Reader A                                                             | 71.3% (61.0, 80.1)         | 82.8% (64.2, 94.2)         | 70.0% (59.4, 79.2)         | 82.8% (64.2, 94.2)         |
| Reader B                                                             | 71.3% (61.0, 80.1)         | 80.0% (61.4, 92.3)         | 70.0% (59.4, 79.2)         | 80.0% (61.4, 92.3)         |
| Reader C                                                             | 74.5% (64.4, 82.9)         | 83.3% (65.3, 94.4)         | 73.3% (63.0, 82.1)         | 83.3% (65.3, 94.4)         |
| On-site                                                              | 75.3% (65.2, 83.6)         | 80.0% (61.4, 92.3)         | 74.2% (63.8, 82.9)         | 80.0% (61.4, 92.3)         |
| Study C – M18 SPECT vs.<br>M36 Diagnosis                             |                            |                            |                            |                            |
| Reader A                                                             | 77.5% (66.0, 86.5)         | 96.7% (82.8, 99.9)         | 76.8% (65.1, 86.1)         | 96.7% (82.8, 99.9)         |
| Reader B                                                             | 77.5% (66.0, 86.5)         | 93.5% (78.6, 99.2)         | 76.8% (65.1, 86.1)         | 93.5% (78.6, 99.2)         |
| Reader C                                                             | 81.7% (70.7, 89.9)         | 96.8% (83.3, 99.9)         | 81.2% (69.9, 89.6)         | 96.8% (83.3, 99.9)         |
| On-site                                                              | 81.4% (70.3, 89.7)         | 90.3% (74.2, 98.0)         | 80.9% (69.5, 89.4)         | 90.3% (74.2, 98.0)         |
| Study C – M36 SPECT vs.<br>M36 Diagnosis                             |                            |                            |                            |                            |
| Reader A                                                             | 75.0% (63.0, 84.7)         | 96.7% (82.8, 99.9)         | 74.2% (62.0, 84.2)         | 96.7% (82.8, 99.9)         |
| Reader B                                                             | 76.9% (64.8, 86.5)         | 96.7% (82.8, 99.9)         | 76.2% (63.8, 86.0)         | 96.7% (82.8, 99.9)         |
| Reader C                                                             | 77.9% (66.2, 87.1)         | 96.7% (82.8, 99.9)         | 77.3% (65.3, 86.7)         | 96.7% (82.8, 99.9)         |
| On-site                                                              | 83.8% (72.9, 91.6)         | 86.2% (68.3, 96.1)         | 83.3% (72.1, 91.4)         | 86.2% (68.3, 96.1)         |
| Study D (3,8)                                                        |                            | N = 78                     |                            | N = 77                     |
| Study D – Baseline SPECT<br>vs. M24 Diagnosis                        |                            |                            |                            |                            |
| On-site                                                              | 97.9% (88.9, 99.9)         | 76.7% (57.7, 90.1)         | 97.9% (88.7, 99.9)         | 76.7% (57.7, 90.1)         |
| Study E (2,7)                                                        |                            |                            |                            | N=92 (Broad)/59 (Narrow)   |
| Study E – Baseline SPECT<br>vs. M12 Diagnosis                        |                            |                            |                            |                            |
| On-site – Broad*                                                     | N/A                        | N/A                        | 93.9% (83.1, 98.7)         | 95.4% (84.2, 99.4)         |
| On-site – Narrow†                                                    | N/A                        | N/A                        | 95.2% (83.8, 99.4)         | 100% (80.5, 100)           |

PPA = Positive percent agreement; NPA = Negative percent agreement; ITD = Intent to diagnose; PP = Per Protocol; CI = Confidence interval; N = Number; SPECT = single-photon emission computed tomography; vs. = Versus; M = Month; N/A = Not applicable.

\*The narrow PP population in study PDT409 included subjects who were diagnosed as having a specific diagnosis, either a specific Parkinsonian Syndrome (PS – Parkinson's Disease, multiple system atrophy, or progressive supranuclear palsy) or a specific non-parkinsonian syndrome (non-PS – essential tremor).

†The broad PP population included subjects both with the narrow (specific) diagnoses summarized above, and subjects with non-specific diagnoses, such as "PS, precise diagnosis not defined" and "non-PS, precise diagnosis not defined."

**Supplemental Table 6.** Summary of inter-reader agreement between each pair of ioflupane (<sup>123</sup>I) image readers and blinded readers vs. on-site reads – ITD population

| <b>Reader Pair</b>     | <b>N</b> | <b>Kappa Coefficient<br/>κ (95% CI)</b> |
|------------------------|----------|-----------------------------------------|
| Study A (4)            |          |                                         |
| Reader A vs. Reader B  | 220      | 0.84 (0.77, 0.92)                       |
| Reader A vs. Reader C  | 220      | 0.89 (0.83, 0.96)                       |
| Reader A vs. Reader D  | 220      | 0.89 (0.82, 0.95)                       |
| Reader A vs. Reader E  | 220      | 0.95 (0.90, 0.99)                       |
| Reader B vs. Reader C  | 220      | 0.88 (0.81, 0.95)                       |
| Reader B vs. Reader D  | 220      | 0.81 (0.73, 0.90)                       |
| Reader B vs. Reader E  | 220      | 0.83 (0.75, 0.91)                       |
| Reader C vs. Reader D  | 220      | 0.90 (0.84, 0.97)                       |
| Reader C vs. Reader E  | 220      | 0.90 (0.84, 0.96)                       |
| Reader D vs. Reader E  | 220      | 0.89 (0.83, 0.96)                       |
| Readers A, B, C, D, E* | 220      | 0.88 (0.84, 0.92)                       |
| Reader A vs. On-site   | 220      | 0.87 (0.80, 0.94)                       |
| Reader B vs. On-site   | 220      | 0.82 (0.73, 0.90)                       |
| Reader C vs. On-site   | 220      | 0.89 (0.82, 0.96)                       |
| Reader D vs. On-site   | 220      | 0.88 (0.82, 0.95)                       |
| Reader E vs. On-site   | 220      | 0.88 (0.81, 0.95)                       |



| <b>Reader Pair</b>            | <b>N</b> | <b>Kappa Coefficient<br/><math>\kappa</math> (95% CI)</b> |
|-------------------------------|----------|-----------------------------------------------------------|
| <b>Study C (I) – Baseline</b> |          |                                                           |
| Reader A vs. Reader B         | 99       | 0.98 (0.94, 1.02)                                         |
| Reader A vs. Reader C         | 101      | 0.98 (0.94, 1.02)                                         |
| Reader B vs. Reader C         | 98       | 1.00 (1.00, 1.00)                                         |
| Readers A, B, C*              | 98       | 0.99 (0.87, 1.10)                                         |
| Reader A vs. On-site          | 102      | 0.92 (0.84, 1.00)                                         |
| Reader B vs. On-site          | 99       | 0.94 (0.87, 1.01)                                         |
| Reader C vs. On-site          | 101      | 0.94 (0.87, 1.01)                                         |
| <b>Study C – Month 18</b>     |          |                                                           |
| Reader A vs. Reader B         | 101      | 0.94 (0.87, 1.01)                                         |
| Reader A vs. Reader C         | 101      | 0.94 (0.87, 1.01)                                         |
| Reader B vs. Reader C         | 102      | 0.92 (0.84, 1.00)                                         |
| Readers A, B, C*              | 101      | 0.93 (0.82, 1.05)                                         |
| Reader A vs. On-site          | 100      | 0.90 (0.81, 0.98)                                         |
| Reader B vs. On-site          | 101      | 0.88 (0.78, 0.97)                                         |
| Reader C vs. On-site          | 101      | 0.92 (0.84, 1.00)                                         |

| <b>Reader Pair</b>           | <b>N</b> | <b>Kappa Coefficient<br/><math>\kappa</math> (95% CI)</b> |
|------------------------------|----------|-----------------------------------------------------------|
| <b>Study C – Month 36</b>    |          |                                                           |
| Reader A vs. Reader B        | 94       | 0.96 (0.90, 1.02)                                         |
| Reader A vs. Reader C        | 97       | 0.96 (0.90, 1.02)                                         |
| Reader B vs. Reader C        | 95       | 1.00 (1.00, 1.00)                                         |
| Readers A, B, C*             | 94       | 0.97 (0.85, 1.09)                                         |
| Reader A vs. On-site         | 95       | 0.83 (0.72, 0.94)                                         |
| Reader B vs. On-site         | 92       | 0.87 (0.77, 0.97)                                         |
| Reader C vs. On-site         | 95       | 0.87 (0.77, 0.97)                                         |
| <b>Study B (5,6)</b>         |          |                                                           |
| Reader A vs. Reader B        | 282      | 0.82 (0.75, 0.89)                                         |
| Reader A vs. Reader C        | 281      | 0.93 (0.88, 0.97)                                         |
| Reader B vs. Reader C        | 280      | 0.86 (0.79, 0.92)                                         |
| Readers A, B, C*             | 272      | 0.88 (0.81, 0.95)                                         |
| Reader A vs. On-site         | 292      | 0.68 (0.60, 0.76)                                         |
| Reader B vs. On-site         | 293      | 0.60 (0.51, 0.69)                                         |
| Reader C vs. On-site         | 296      | 0.64 (0.55, 0.72)                                         |
| <b>Study D (3,8)/E (2,7)</b> |          |                                                           |
| No Readers                   | NA       | NA                                                        |

ITD = Intent to diagnose; N = Number of images with non-missing values for the respective reader pair; CI = Confidence interval; vs. = Versus; NA = Not applicable.

\* Multiple coefficient for all independent image readers.

**Supplemental Table 7.** Summary of inter-reader agreement between each pair of ioflupane (<sup>123</sup>I) image readers and blinded readers vs. on-site reads – PP population

| <b>Reader Pair</b>            | <b>N</b> | <b>Kappa Coefficient<br/>κ (95% CI)</b> |
|-------------------------------|----------|-----------------------------------------|
| <b>Study A (4)</b>            |          |                                         |
| Reader A vs. Reader B         | 157      | 0.86 (0.77, 0.95)                       |
| Reader A vs. Reader C         | 157      | 0.88 (0.79, 0.96)                       |
| Reader A vs. Reader D         | 157      | 0.85 (0.76, 0.94)                       |
| Reader A vs. Reader E         | 157      | 0.92 (0.86, 0.99)                       |
| Reader B vs. Reader C         | 157      | 0.89 (0.80, 0.97)                       |
| Reader B vs. Reader D         | 157      | 0.83 (0.73, 0.92)                       |
| Reader B vs. Reader E         | 157      | 0.84 (0.74, 0.93)                       |
| Reader C vs. Reader D         | 157      | 0.91 (0.84, 0.98)                       |
| Reader C vs. Reader E         | 157      | 0.89 (0.81, 0.97)                       |
| Reader D vs. Reader E         | 157      | 0.86 (0.78, 0.95)                       |
| Readers A, B, C, D, E*        | 157      | 0.87 (0.82, 0.92)                       |
| Reader A vs. On-site          | 157      | 0.88 (0.80, 0.96)                       |
| Reader B vs. On-site          | 157      | 0.89 (0.81, 0.97)                       |
| Reader C vs. On-site          | 157      | 0.94 (0.88, 1.00)                       |
| Reader D vs. On-site          | 157      | 0.91 (0.84, 0.98)                       |
| Reader E vs. On-site          | 157      | 0.89 (0.81, 0.97)                       |
| <b>Study C (1) – Baseline</b> |          |                                         |
| Reader A vs. Reader B         | 97       | 0.98 (0.94, 1.02)                       |
| Reader A vs. Reader C         | 99       | 0.98 (0.94, 1.02)                       |
| Reader B vs. Reader C         | 96       | 1.00 (1.00, 1.00)                       |
| Readers A, B, C*              | 96       | 0.99 (0.87, 1.10)                       |
| Reader A vs. On-site          | 100      | 0.92 (0.84, 1.00)                       |
| Reader B vs. On-site          | 97       | 0.94 (0.87, 1.01)                       |
| Reader C vs. On-site          | 99       | 0.94 (0.87, 1.01)                       |

| <b>Reader Pair</b>           | <b>N</b> | <b>Kappa Coefficient<br/>κ (95% CI)</b> |
|------------------------------|----------|-----------------------------------------|
| <b>Study C – Month 18</b>    |          |                                         |
| Reader A vs. Reader B        | 99       | 0.94 (0.87, 1.01)                       |
| Reader A vs. Reader C        | 99       | 0.94 (0.87, 1.01)                       |
| Reader B vs. Reader C        | 100      | 0.92 (0.84, 1.00)                       |
| Readers A, B, C*             | 99       | 0.93 (0.82, 1.05)                       |
| Reader A vs. On-site         | 98       | 0.90 (0.81, 0.98)                       |
| Reader B vs. On-site         | 99       | 0.88 (0.78, 0.97)                       |
| Reader C vs. On-site         | 99       | 0.92 (0.84, 1.00)                       |
| <b>Study C – Month 36</b>    |          |                                         |
| Reader A vs. Reader B        | 92       | 0.96 (0.90, 1.02)                       |
| Reader A vs. Reader C        | 95       | 0.96 (0.90, 1.02)                       |
| Reader B vs. Reader C        | 93       | 1.00 (1.00, 1.00)                       |
| Readers A, B, C*             | 92       | 0.97 (0.85, 1.09)                       |
| Reader A vs. On-site         | 93       | 0.83 (0.71, 0.94)                       |
| Reader B vs. On-site         | 90       | 0.86 (0.76, 0.97)                       |
| Reader C vs. On-site         | 93       | 0.87 (0.77, 0.97)                       |
| <b>Study B (5,6)</b>         |          |                                         |
| Reader A vs. Reader B        | 259      | 0.82 (0.75, 0.89)                       |
| Reader A vs. Reader C        | 258      | 0.92 (0.87, 0.97)                       |
| Reader B vs. Reader C        | 255      | 0.85 (0.78, 0.92)                       |
| Readers A, B, C*             | 249      | 0.88 (0.80, 0.95)                       |
| Reader A vs. On-site         | 269      | 0.68 (0.59, 0.76)                       |
| Reader B vs. On-site         | 268      | 0.59 (0.50, 0.68)                       |
| Reader C vs. On-site         | 272      | 0.63 (0.54, 0.72)                       |
| <b>Study D (3,8)/E (2,7)</b> |          |                                         |

| <b>Reader Pair</b> | <b>N</b> | <b>Kappa Coefficient<br/>κ (95% CI)</b> |
|--------------------|----------|-----------------------------------------|
| No Readers         | NA       | NA                                      |

PP = Per protocol; N = Number of images with non-missing values for the respective reader pair; CI = Confidence interval; vs. = Versus; NA = Not applicable.

\* Multiple coefficient for all independent image readers.

**Supplemental Table 8.** Intra-reader agreement for each independent BIE Ioflupane (<sup>123</sup>I) SPECT reader in Study B (5,6).

| <b>Reader</b> | <b>N</b> | <b>n</b> | <b>Cohen's Kappa (95%<br/>CI)</b> |
|---------------|----------|----------|-----------------------------------|
| Reader A      | 26       | 26       | 1.00 (1.00, 1.00)                 |
| Reader B      | 24*      | 24*      | 1.00 (1.00, 1.00)                 |
| Reader C      | 26       | 26       | 1.00 (1.00, 1.00)                 |

BIE SPECT = Blinded image evaluation single-photon emission computed tomography; N = number of images with non-missing value for SPECT visual assessment for the 2 respective reads; n = number of images with agreement; CI = Confidence interval.

\*Reader B had 2 non-evaluable cases during the first read, so these 2 cases were removed from intra-reader analysis for this reader.
